# Supplementary material for: HOX epimutations driven by maternal SMCHD1/LRIF1 haploinsufficiency trigger homeotic transformations in genetically wildtype offspring
Source: PubMed Central journal article supplement (PMC9226161; doi:10.1038/s41467-022-31185-8), 2022-06-23
Supplement: 41467_2022_31185_MOESM1_ESM.pdf [file 41467_2022_31185_MOESM1_ESM.pdf]

**HOX epimutations driven by maternal SMCHD1/LRIF1 haploinsufficiency trigger homeotic transformations in genetically wildtype offspring**

Shifeng Xue, Thanh Thao Nguyen Ly, Raunak S. Vijayakar, Jingyi Chen, Joel Ng, Ajay S. Mathuru, Frederique Magdinier, Bruno Reversade

**Supplementary information**

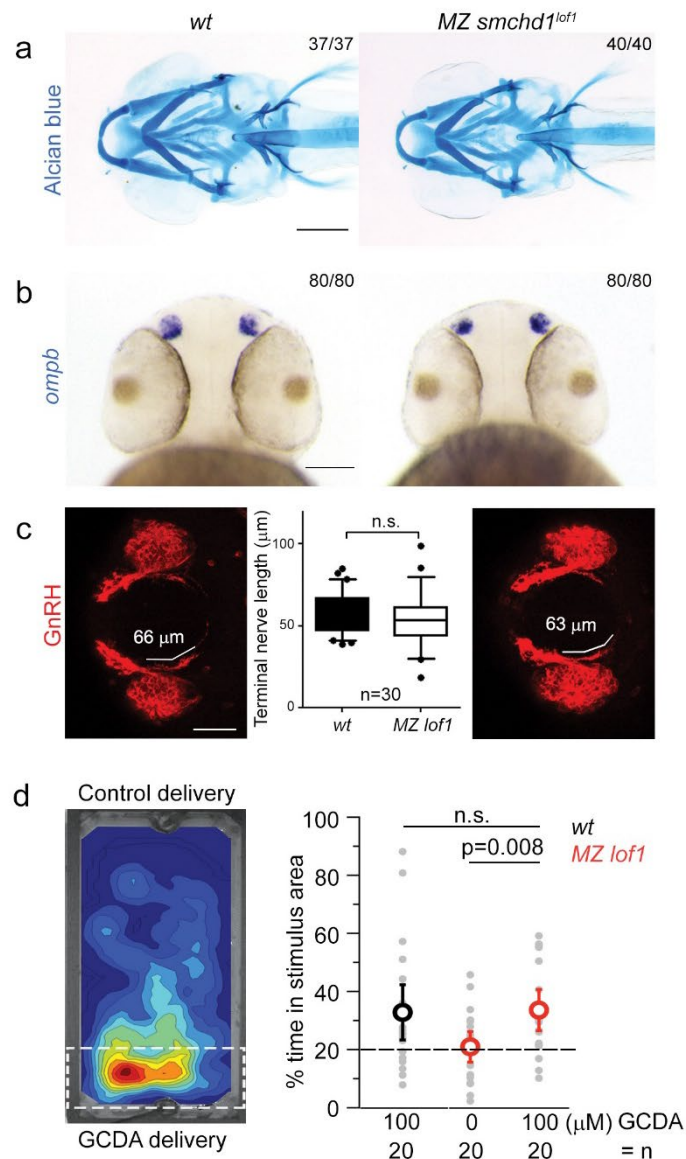

**Supplementary Figure 1. *MZ smchd1* null fish do not model Bosma arhinia microphthalmia syndrome**

**a**, Alcian blue staining shows no difference in craniofacial cartilage development at 5 dpf. **b**, The olfactory epithelium forms normally in *MZ lof1* fish as evidenced by *ompb* expression at 2 dpf, an olfactory epithelium marker. For **(a)** and **(b)**, numbers at top right corner represent numbers of embryos with this phenotype (eg. 80 out of 80). Scale bar = 200  $\mu\text{m}$ . **c**, Immunofluorescence of gonadotropic releasing hormone (GnRH) in 33 hpf embryos. Measurements of the terminal nerves marked in white reveal no differences in lengths between *wt* and *MZ lof1* fish. Boxes extend from 25th to 75th percentiles, lines in the centre of boxes represent median, whiskers represent 5th to 95th percentile, n = number of embryos measured per genotype, 2 measurements per embryo (left and right). P values were calculated by 2-tailed unpaired Student's t test. Scale bar = 100  $\mu\text{m}$ . **d**,

Representative trace of a *MZ lof1* larva spending more time in the area near to attractive odor stimulant (glycochenodeoxycholic acid, GCDA) (left). Quantification of olfactory assay shows that *MZ lof1* fish can detect and respond to an odor stimulus (right). Whiskers show 95% confidence intervals. P values were calculated by 2-tailed paired Student's t test.

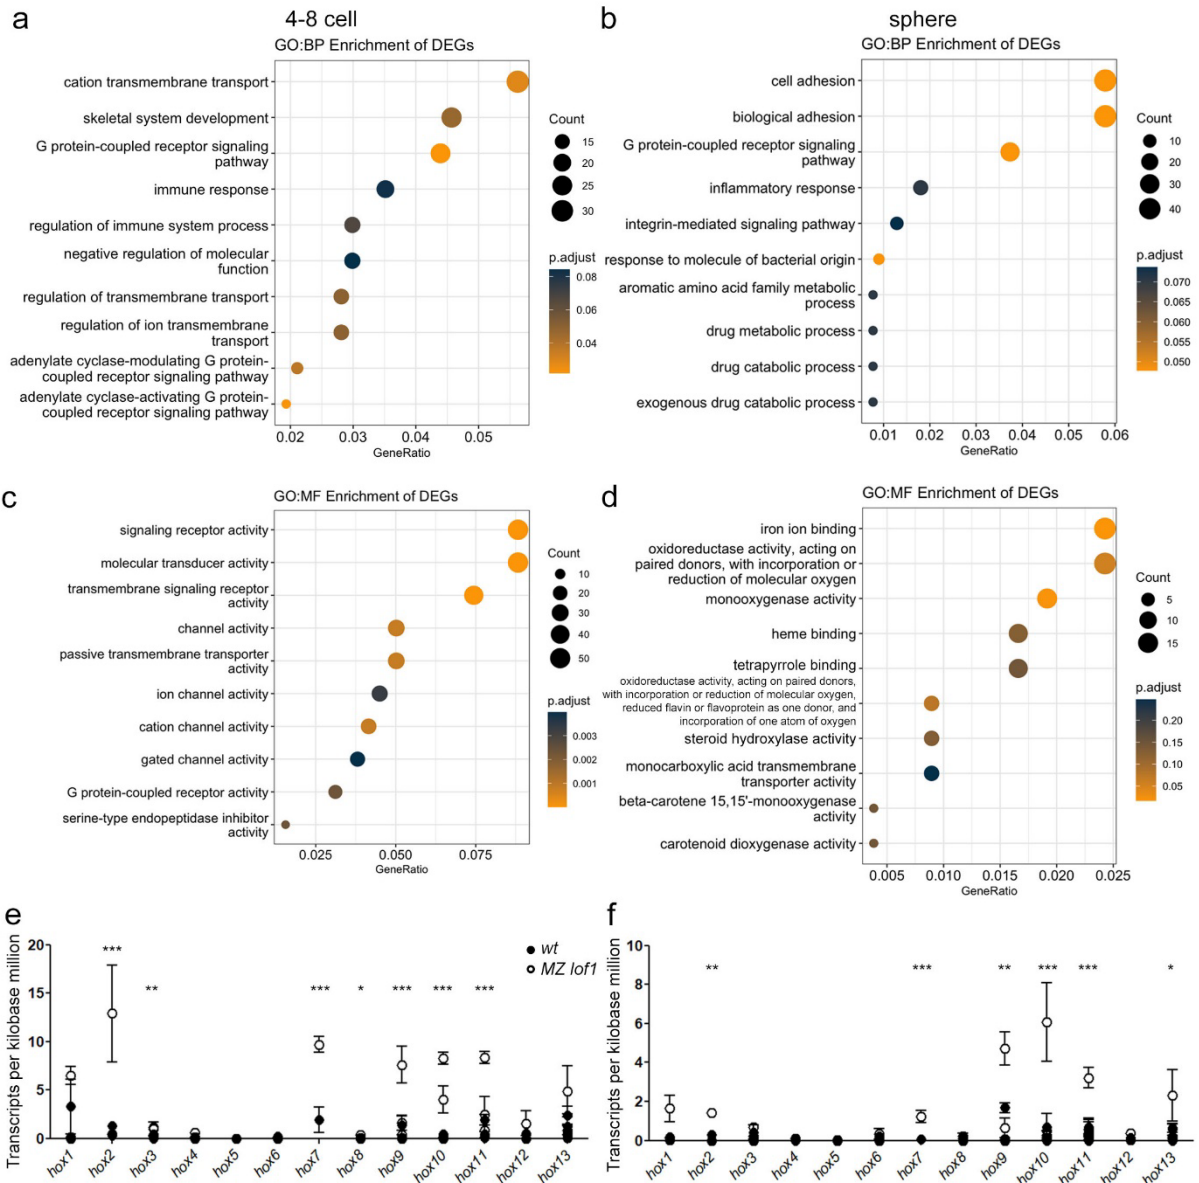

**Supplementary Figure 2. Analysis of RNA-sequencing of 4-8-cell and sphere stage embryos.**

**a-b**, Gene ontology (GO) enrichment for biological process (BP) of differentially enriched genes (DEGs) in 4-8-cell (**a**) and sphere stage (**b**) embryos. **c-d**, Gene ontology (GO) enrichment for molecular function (MF) of DEGs in 4-8-cell (**c**) and sphere (**d**) embryos. **e-f**, Transcripts per kilobase million of *hox* genes from RNA-sequencing of 4-8-cell embryos (**e**) or sphere stage embryos (**f**). Data are presented as mean values +/- SD. n = 3 biological samples. \* represent FDR-adjusted p values from DESeq2. \*p<0.05, \*\*p<0.01, \*\*\*p<0.001

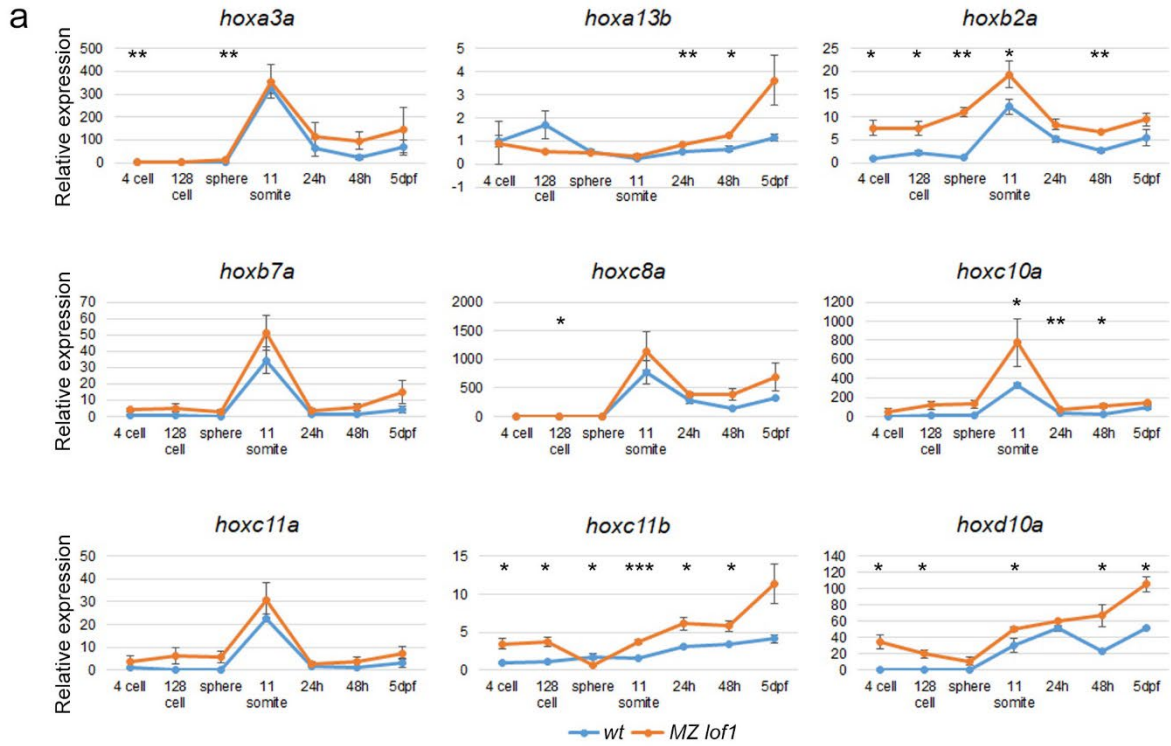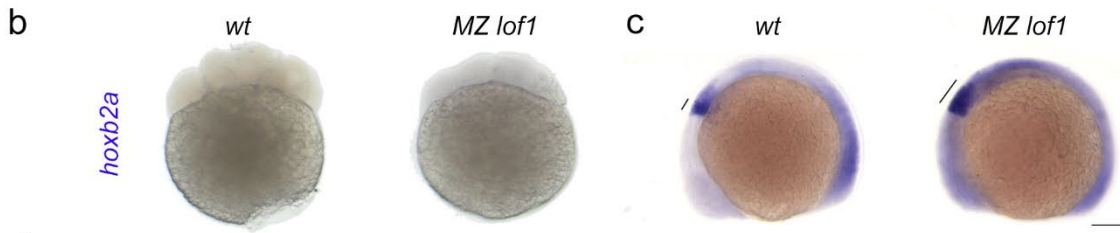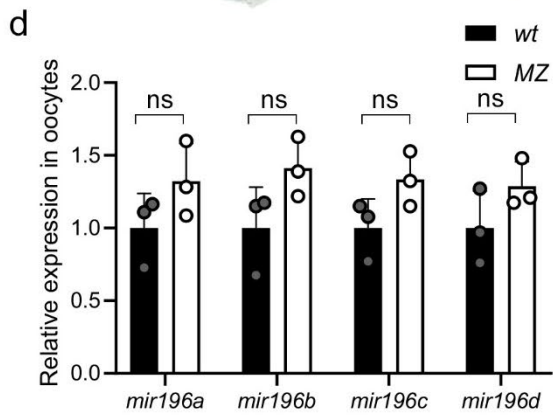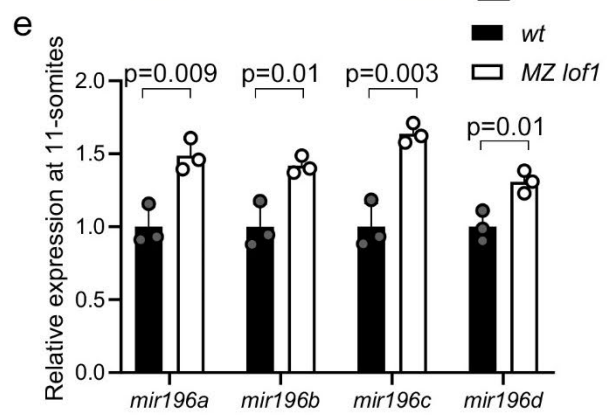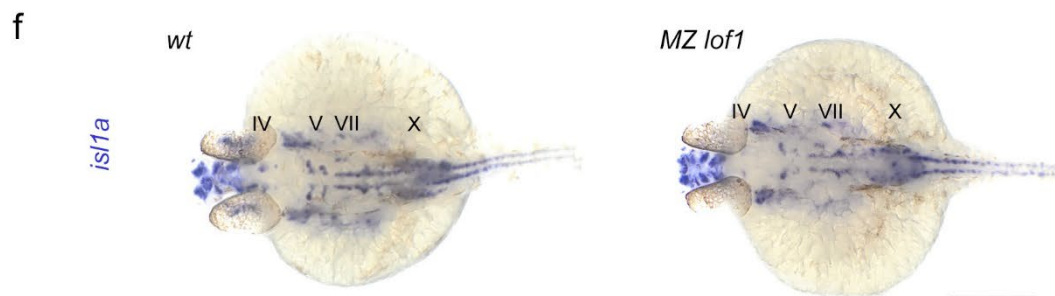

### Supplementary Figure 3. Analysis of *hox* expression changes over time

**a**, qPCR analysis of *hox* expression in *wt* and *MZ lof1* embryos over time. Expression of *hox* gene in *wt* at 4-cell stage is set at 1. Data represents mean  $\pm$  standard deviation. **b-c**, In situ hybridisation (ISH) of *hoxb2a* at 8-cell (**b**) and 11-somite stage (**c**). Expression of *hoxb2a* at 8-cell was not reliably detectable by in situ hybridisation. Scale bar = 200  $\mu$ m. **d-e**, qPCR of *mir-196* family mature miRNAs in oocytes (**d**) and 11-somite stage (**e**). P values were calculated by 2-tailed unpaired Student's t test. Data represents mean  $\pm$  standard deviation of 3 biological replicates. \* $p < 0.05$ , \*\* $p < 0.01$ , \*\*\* $p < 0.001$ . **f**, ISH of *isl1a* of cranial nerves in the hindbrain do not show a patterning difference between *wt* and *MZ lof1* embryos at 30 hpf. n = 40 *wt*, 80 *MZ lof1* embryos. Scale bar = 200  $\mu$ m.

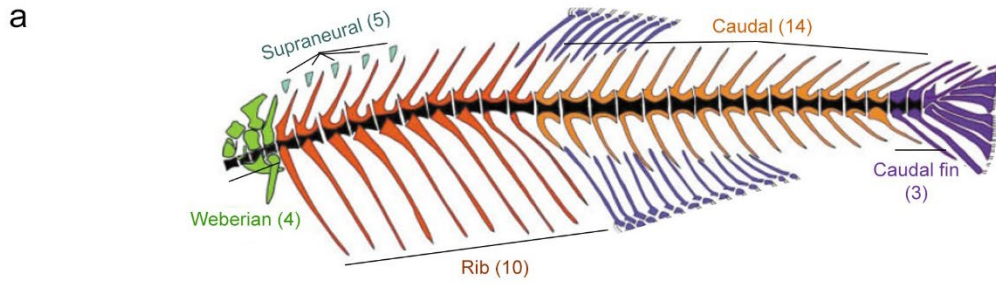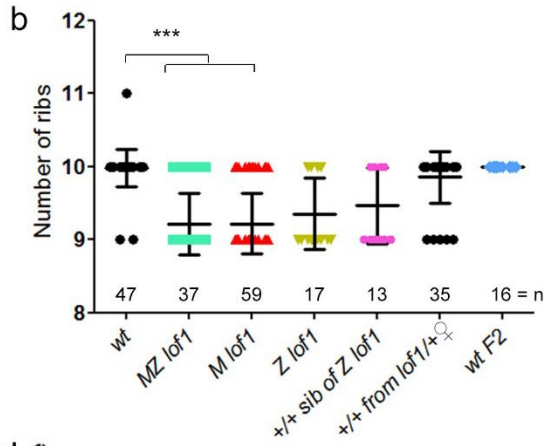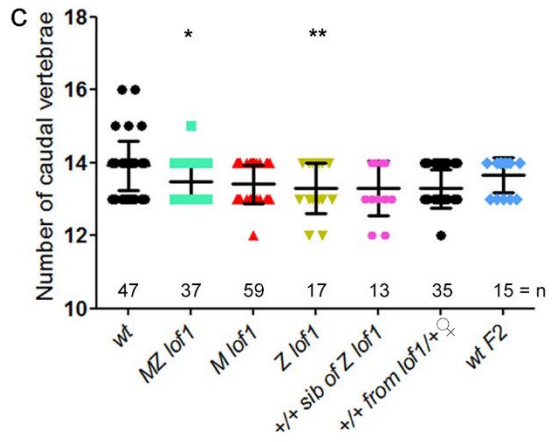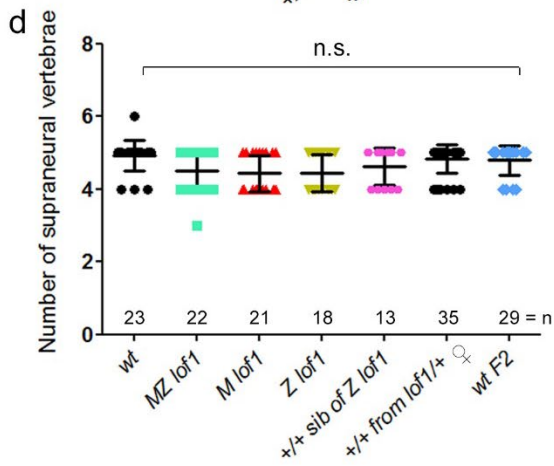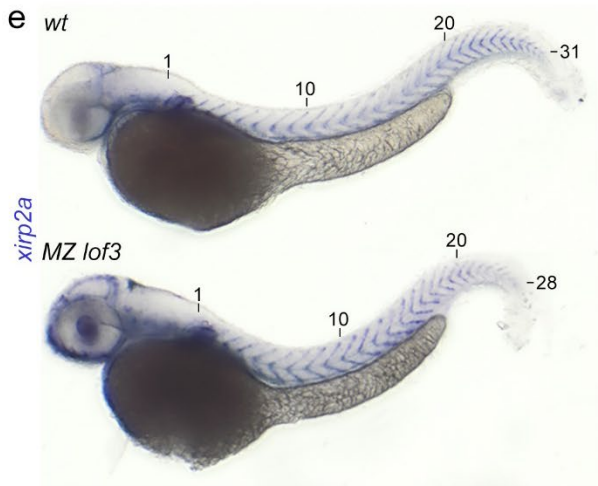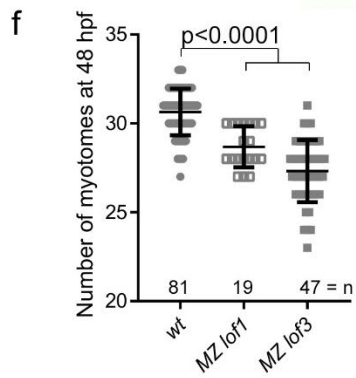

#### Supplementary Figure 4. Breakdown of vertebral number changes

**a**, Schematic of zebrafish skeleton adapted from Bird and Mabee (2003)<sup>41</sup>. Copyright © 2003 Wiley-Liss, Inc. **b-d**, Number of ribs (**b**), caudal vertebrae (**c**) and supraneural vertebrae (**d**) in zebrafish from different genetic crosses. Data are presented as mean values +/- SD. P values were calculated by the Kruskal-Wallis test followed by Dunn's Multiple Comparison Test. **e**, Reduction in number of myotomes as shown by somitic myotome boundary marker *xirp2a* at 48 hpf. Scale bar = 500  $\mu$ m. **f**, Quantification shows a reduction in the number of myotomes in the *MZ lof* larvae. Data are presented as mean values +/- SD. P values were calculated by the Kruskal-Wallis test followed by Dunn's Multiple Comparison Test. \* $p < 0.05$ , \*\* $p < 0.01$ , \*\*\* $p < 0.001$ .



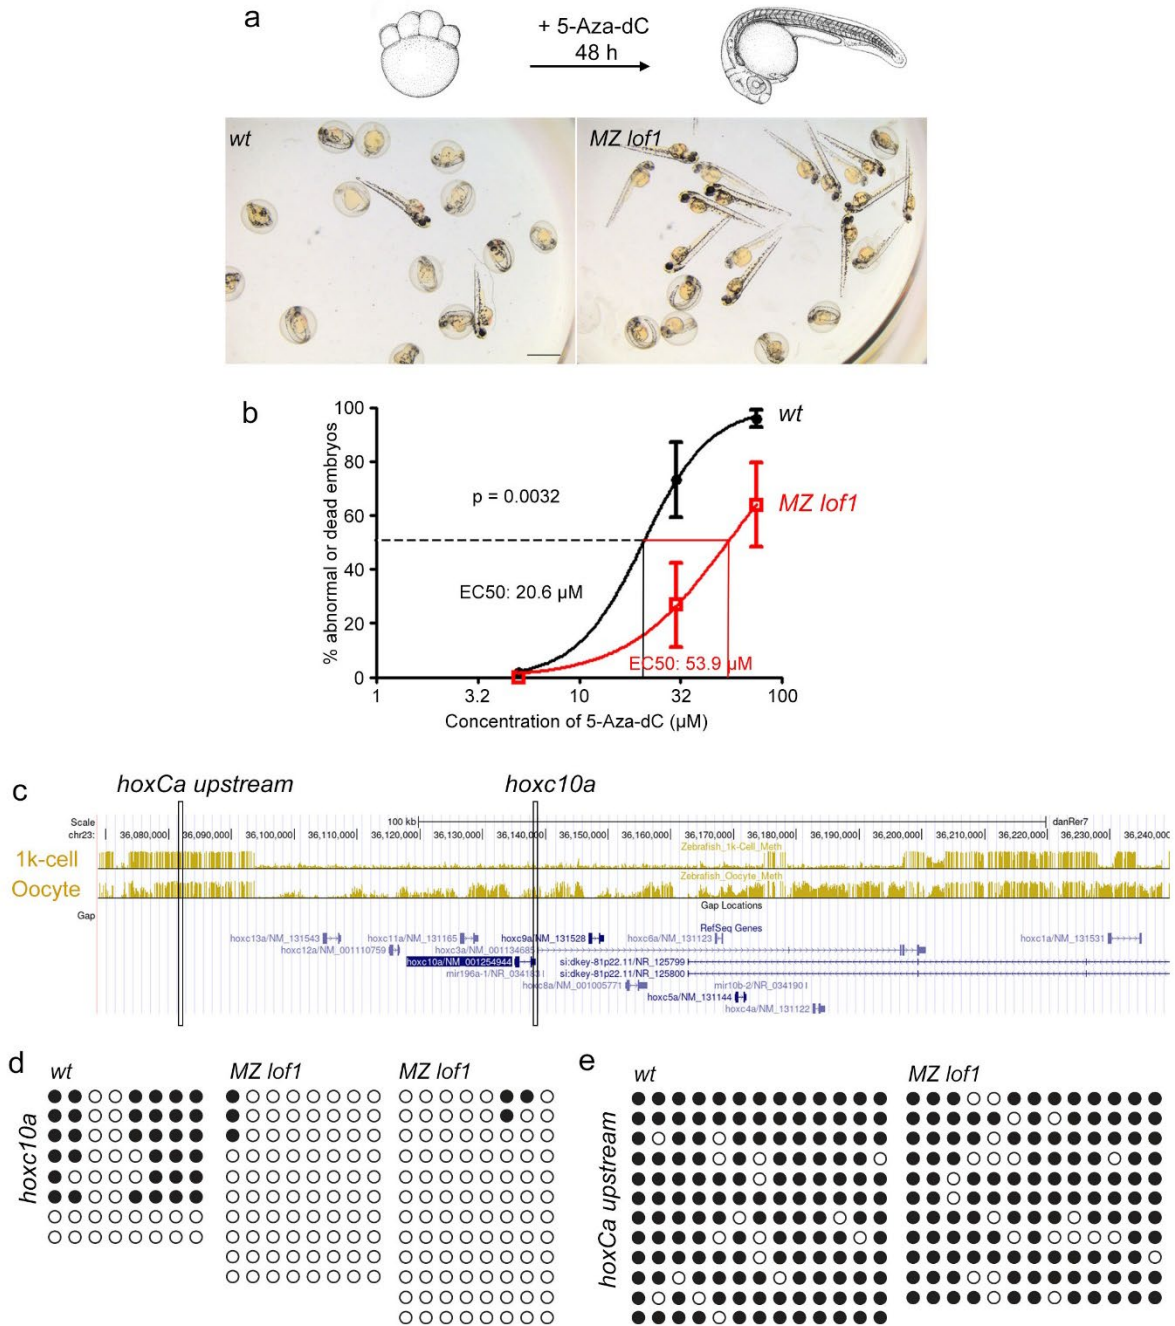

### Supplementary Figure 5. DNA methylation analysis in zebrafish embryos

**a**, *wt* or *MZ smchd1 lof1* embryos were treated with DNA methylation inhibitor 5-Aza-dC for 2 days. Representative images of embryos treated with 30 µM 5-Aza-dC are shown. Defects observed include edema, developmental delay and axis truncation. Scale bar = 1 mm. **b**, *MZ lof1* embryos show enhanced survival and fewer developmental defects than *wt*.  $n = 121$  *wt*, 123 *MZ smchd1 lof1* embryos. Data are presented as mean values  $\pm$  SEM. Curves were fitted with least squares regression. P values were calculated by extra sum-of-squares F test. **c**, Location of DNA methylation analysis in the *hoxCa*

locus. DNA methylation data of wildtype embryos from Jiang et al. (2013)<sup>19</sup>. **d**, Replicates of DNA methylation analysis at *hoxc10a*. **e**, DNA methylation analysis at *hoxCa* upstream. Hypomethylation in mutant embryos was only observed at positions in *hox* loci which undergo dynamic changes during embryogenesis.

## References

41. Bird, N. C. & Mabee, P. M. Developmental morphology of the axial skeleton of the zebrafish, *Danio rerio* (Ostariophysi: Cyprinidae). *Dev. Dyn.* **228**, 337–357 (2003).
